# Supplementary material for: Boosting or moderating surface-initiated Cu(0)-mediated controlled radical polymerization with external additives
Source: Royal Society of Chemistry journal article supplement (doi:10.1039/d0py01061h), 2020-01-01
Supplement: d0py01061h1.pdf [file d0py01061h1.pdf]

## Supporting information

# Boosting or Moderating Surface-Initiated Cu(0)-Mediated Controlled Radical Polymerization with External Additives

Wei Li,<sup>†</sup> Wenbo Sheng,<sup>†</sup> Rainer Jordan,<sup>\*,†</sup> Tao Zhang<sup>\*,‡</sup>

<sup>†</sup> Chair of Macromolecular Chemistry, Faculty of Chemistry and Food Chemistry, School of Science, Technische Universität Dresden, Mommsenstr. 4, 01069 Dresden, Germany

<sup>‡</sup> Key Laboratory of Marine Materials and Related Technologies, Zhejiang Key Laboratory of Marine Materials and Protective Technologies, Ningbo Institute of Materials Technology and Engineering, Chinese Academy of Sciences, Ningbo 315201, PR China

## Supplementary figures

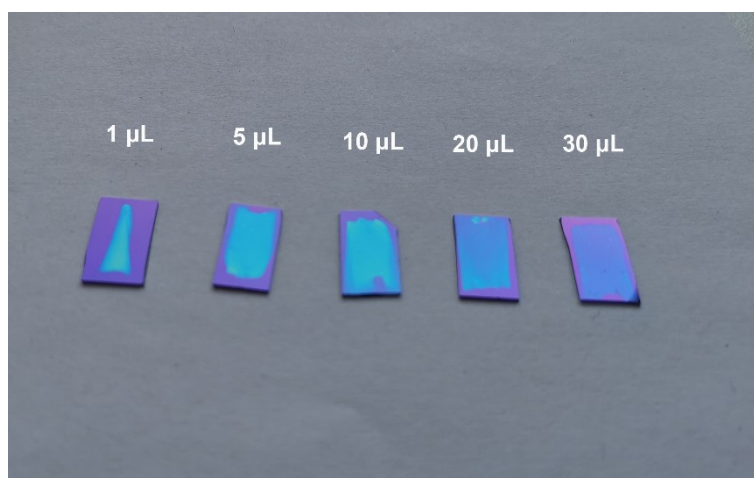

**Fig. S1.** Photographs of POEGMA brush-modified substrate with different PMDETA in water/methanol in air.

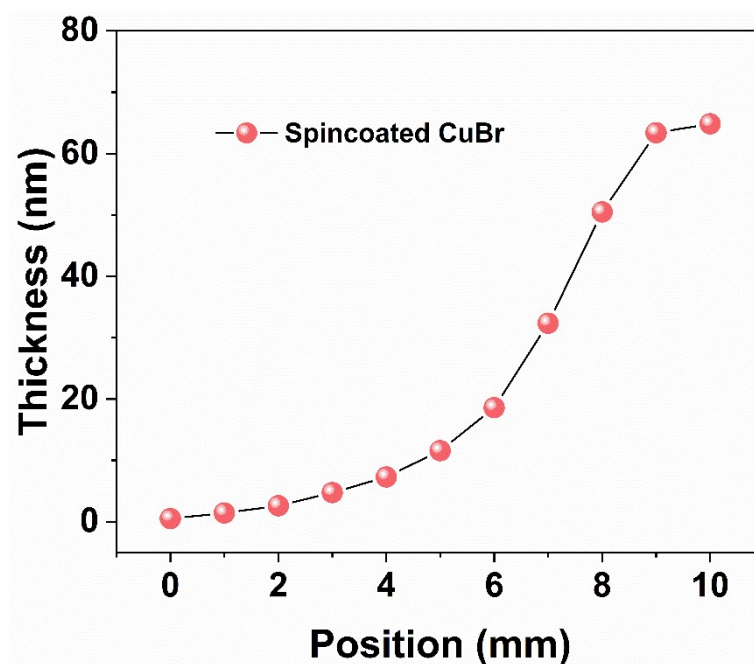

**Fig. S2.** Gradient POEGMA brushes via spin-coated CuBr in 1 h in air.

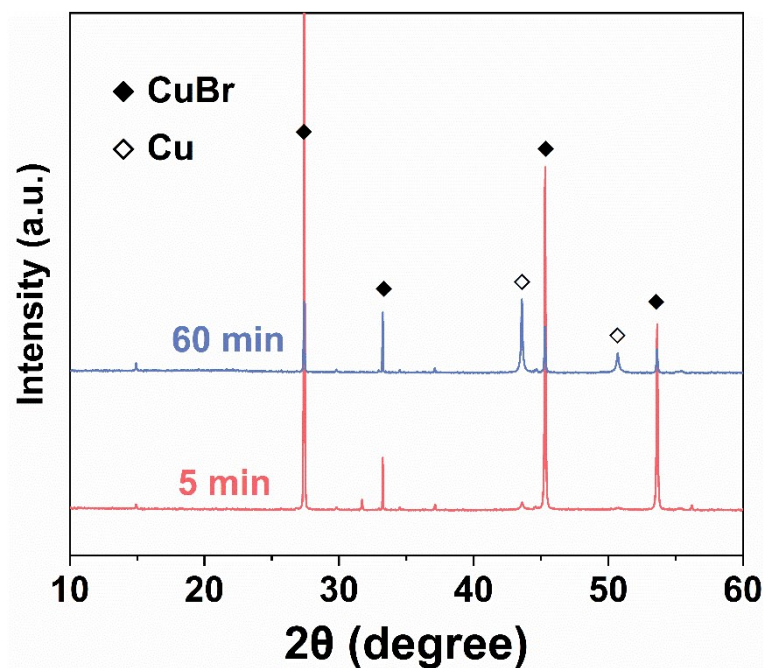

**Fig. S3.** XRD spectra of spin-coated CuBr after polymerization 5 and 60 min in air.

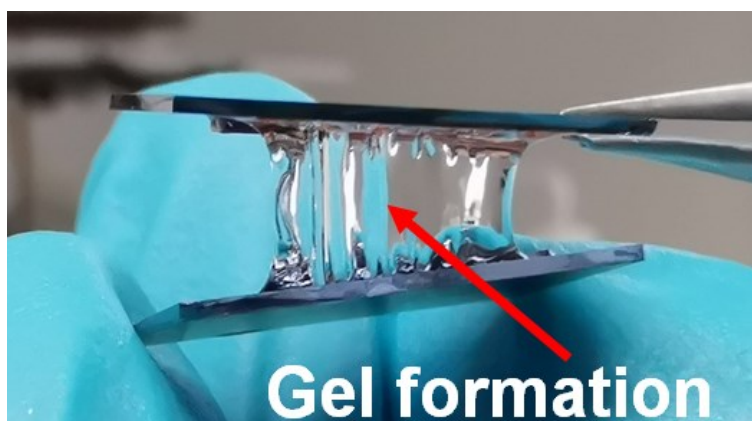

**Fig. S4.** Photo image of surface-initiated hydrogel formation in 1 h in the presence of  $[\text{CuBr}_2]:[\text{PMDETA}] = 1:2$  in air.
